# Supplementary material for: A tumor-microenvironment-responsive nanomaterial for cancer chemo-photothermal therapy
Source: Royal Society of Chemistry journal article supplement (doi:10.1039/d0ra04171h), 2020-01-01
Supplement: d0ra04171h1.pdf [file d0ra04171h1.pdf]

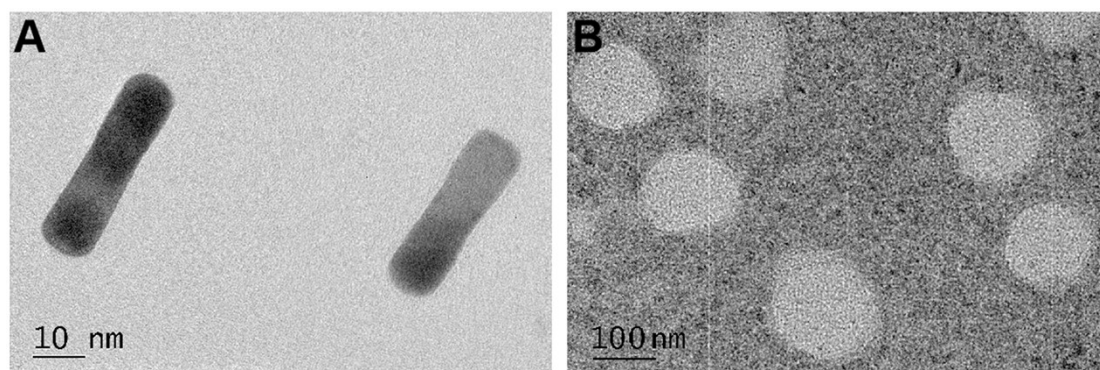

**Fig. S1** TEM images of (A) AuNRs and (B) LV that were negative stained with 1 wt% sodium phosphotungstate.

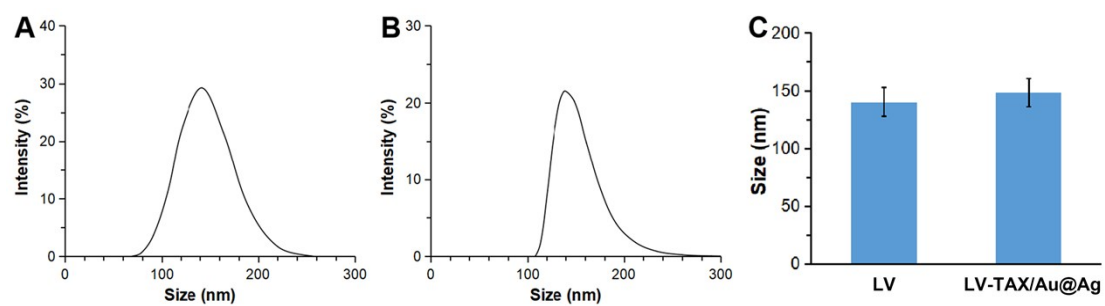

**Fig. S2** Size distribution of (A) LV and (B) LV-TAX/Au@Ag. (C) Average diameter of LV and LV-TAX/Au@Ag. All data represent mean  $\pm$  SD ( $n = 5$ ).

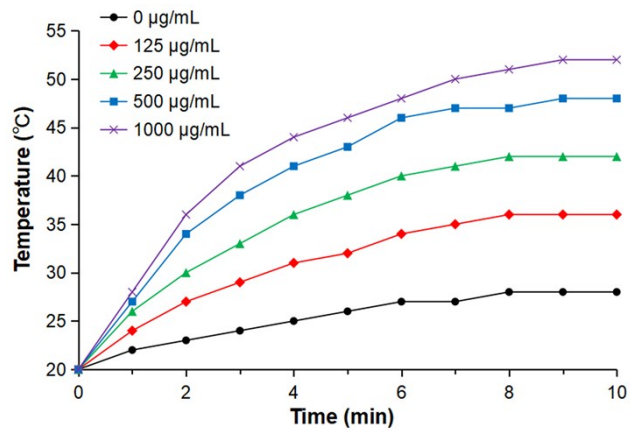

**Fig. S3** Increase of temperature at different concentrations of LV-TAX/Au@Ag (etched with H<sub>2</sub>O<sub>2</sub>) irradiated by an 808 nm laser (1 W/cm<sup>2</sup>).
